# Supplementary material for: Hydration makes a difference! How to tune protein complexes between liquid–liquid and liquid–solid phase separation
Source: Royal Society of Chemistry journal article supplement (doi:10.1039/d3cp03299j), 2023-01-01
Supplement: d3cp03299j1.pdf [file d3cp03299j1.pdf]

### Electronic Supplementary Information

#### Hydration makes a difference! How to tune protein complexes between liquid-liquid and liquid-solid phase separation.

Sashary Ramos<sup>1</sup>, Janine Kamps<sup>2</sup>, Simone Pezzotti<sup>1</sup>, Konstanze F. Winklhofer<sup>3</sup>, Jörg Tatzelt<sup>2</sup>,  
and Martina Havenith<sup>1,4</sup>

<sup>1</sup>*Department of Physical Chemistry II, Ruhr University Bochum, Germany*

<sup>2</sup>*Department of Biochemistry of Neurodegenerative Diseases, Institute of Biochemistry and Pathobiochemistry, Ruhr University Bochum, Bochum, Germany*

<sup>3</sup>*Department of Molecular Cell Biology, Institute of Biochemistry and Pathobiochemistry, Ruhr University Bochum, Bochum, Germany*

<sup>4</sup>*Department of Physics, TU Dortmund, Dortmund, Germany*

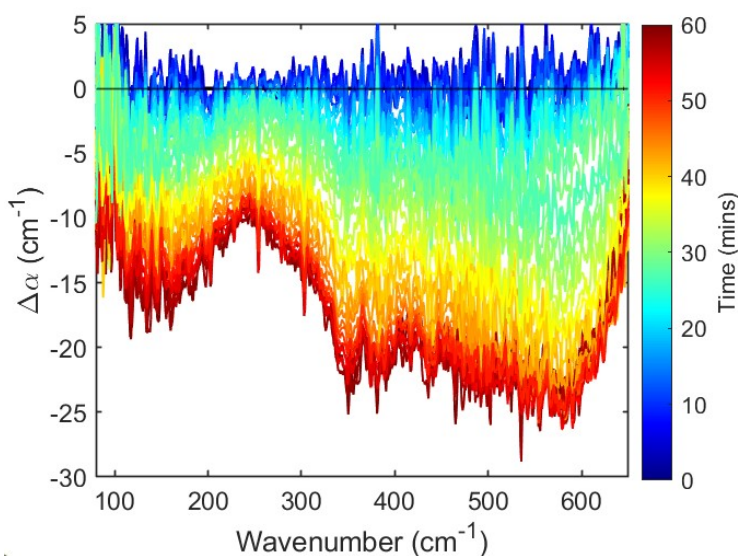

**Figure S1.** Example difference spectra of N1-PrP generated by the subtraction of the first spectrum from every subsequent spectrum in the measurement series up to 60 mins. The time series depicts the evolution of the LLPS as protein droplets settle on the surface of the diamond ATR crystal. The final difference spectrum from 60 mins is shown in the main text in Figure 2C.

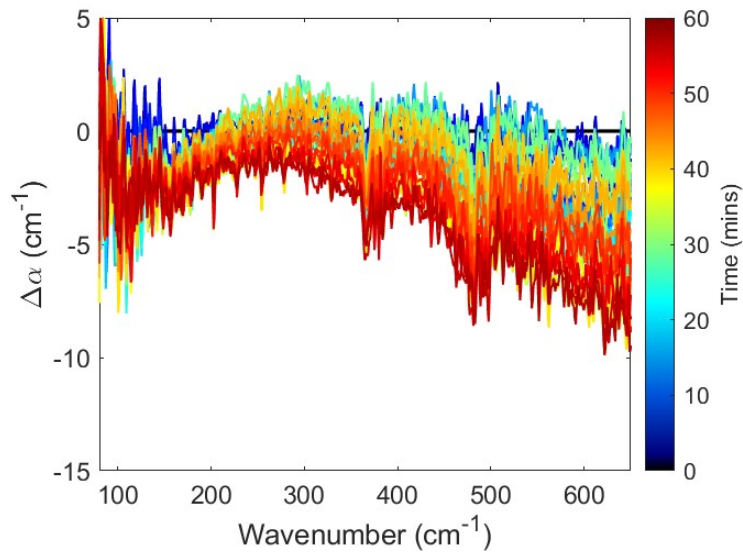

**Figure S2.** Example difference spectra of N1ΔPB generated by the subtraction of the first spectrum from every subsequent spectrum in the measurement series up to 60 mins. The time series depicts the evolution of the LSPS as protein aggregates settle on the surface of the diamond ATR crystal. The final difference spectrum from 60 mins is shown in the main text in Figure 2C.
